# Supplementary material for: Mortality-Risk Prediction Model from Road-Traffic Injury in Drunk Drivers: Machine Learning Approach
Source: MDPI journal article supplement (doi:10.3390/ijerph181910540), 2021-10-08

## **Supplementary Materials**

**Table S1.** The parameter setting of the derived models

**Table S2.** The discrimination performance of mortality prediction models using imbalance data

**Figure S1.** Receiver Operating Characteristic curves from 10-fold cross-validation of the imbalanced learning classifiers

**Figure S2.** Calibration plot of the imbalanced learning classifiers

This supplementary material has been provided by the authors to give readers additional information about their work.

**Table S1.** The parameter setting of the derived models.

| Type of Model       | Parameters settings                                                                                                                                                                                                                |
|---------------------|------------------------------------------------------------------------------------------------------------------------------------------------------------------------------------------------------------------------------------|
| Imbalanced learning |                                                                                                                                                                                                                                    |
| GBC                 | {'criterion': 'friedman_mse', 'learning_rate': 0.1, 'loss': 'deviance', 'max_depth': 4, 'max_features': 'sqrt', 'min_impurity_decrease': 0.1, 'n_estimators': 10}                                                                  |
| RF                  | {'bootstrap': True, 'class_weight': {0: 1, 1: 2}, 'max_depth': 90, 'max_features': 'sqrt', 'min_samples_leaf': 7, 'min_samples_split': 8, 'n_estimators': 200}                                                                     |
| MLP                 | {'activation': 'relu', 'alpha': 0.001, 'early_stopping': False, 'hidden_layer_sizes': 26, 'learning_rate': 'adaptive', 'learning_rate_init': 0.005, 'max_iter': 10000, 'power_t': 0.5, 'solver': 'adam', 'warm_start': False}      |
| Logistic            | {'C': 0.0001, 'class_weight': {0: 1, 1: 2}, 'penalty': 'l1', 'solver': 'saga'}                                                                                                                                                     |
| KNN                 | {'algorithm': 'brute', 'metric': 'manhattan', 'n_neighbors': 11, 'weights': 'uniform'}                                                                                                                                             |
| SMOTE               |                                                                                                                                                                                                                                    |
| GBC                 | {'criterion': 'friedman_mse', 'learning_rate': 0.1, 'loss': 'exponential', 'max_depth': 10, 'max_features': 'auto', 'min_impurity_decrease': 0.1, 'n_estimators': 100}                                                             |
| RF                  | {'bootstrap': True, 'class_weight': {0: 1, 1: 2}, 'max_depth': 80, 'max_features': 'auto', 'min_samples_leaf': 3, 'min_samples_split': 8, 'n_estimators': 300}                                                                     |
| MLP                 | {'activation': 'logistic', 'alpha': 0.0001, 'early_stopping': False, 'hidden_layer_sizes': 93, 'learning_rate': 'constant', 'learning_rate_init': 0.005, 'max_iter': 10000, 'power_t': 0.5, 'solver': 'adam', 'warm_start': False} |
| Logistic            | {'C': 1.623776739188721, 'class_weight': {0: 1, 1: 2}, 'penalty': 'l1', 'solver': 'liblinear'}                                                                                                                                     |
| KNN                 | {'algorithm': 'ball_tree', 'metric': 'manhattan', 'n_neighbors': 2, 'weights': 'distance'}                                                                                                                                         |

GBC, Gradient Boosting classifier; KNN, K-Nearest Neighbor; Logit, Logistic regression; MLP, Multi-layer Perceptrons; RF, Random Forest.

**Table S2.** The discrimination performance of mortality prediction models using imbalance data.

| Model    | AUC  |             | Likelihood ratio |          | Sensitivity | Specificity | Predictive value |          |
|----------|------|-------------|------------------|----------|-------------|-------------|------------------|----------|
|          | mean | 95% CI      | Positive         | Negative |             |             | Positive         | Negative |
| GBC      | 0.62 | 0.58 - 0.67 | 1.77             | 1.00     | 0.31        | 99.83       | 14.29            | 91.41    |
| RF       | 0.60 | 0.56 - 0.65 | 1.44             | 0.90     | 26.34       | 81.76       | 12.43            | 91.87    |
| MLP      | 0.61 | 0.56 - 0.65 | 1.62             | 0.98     | 4.89        | 96.98       | 13.22            | 91.55    |
| Logistic | 0.63 | 0.57 - 0.68 | 3.39             | 1.00     | 0.23        | 99.93       | 25.00            | 91.06    |
| KNN      | 0.54 | 0.51 - 0.56 | 10.62            | 1.00     | 0.31        | 99.97       | 50.00            | 91.42    |

AUC: Area under the received operating characteristic curve, GBC, Gradient Boosting classifier; KNN, K-Nearest

Neighbor; Logit, Logistic regression; MLP, Multi-layer Perceptrons; RF, Random Forest.

**Figure S1.** Receiver Operating Characteristic curves from 10-fold cross-validation of the imbalanced learning classifiers.

1a. Gradient Boosting Classifier (GBC) model

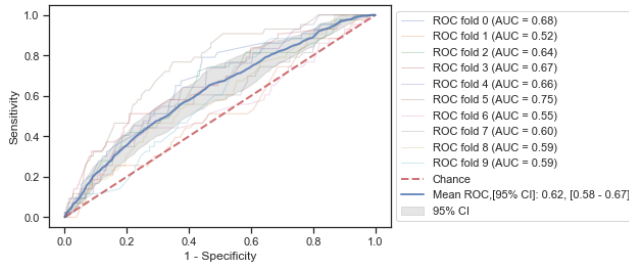

1b. Random Forest (RF) model

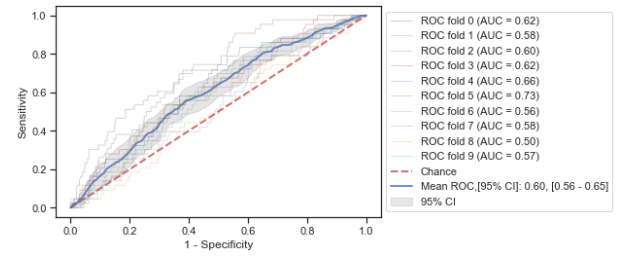

1c. Multi-Layer Perceptron (MLP) model

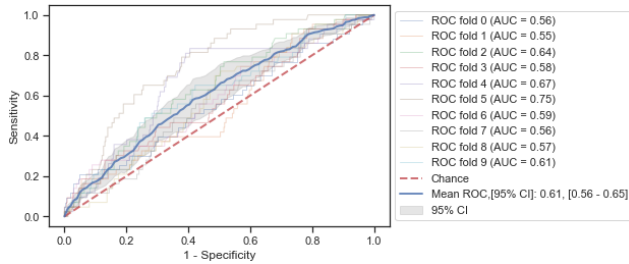

1d. Regularized Logistic Regression (Logit) model

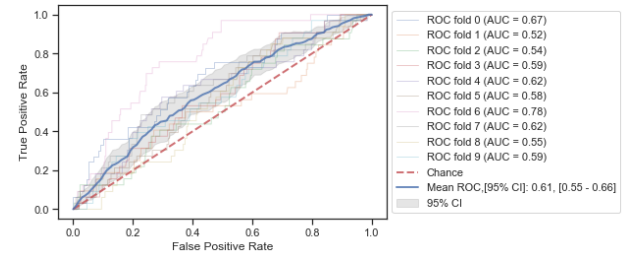

1e. K-Nearest Neighbor (KNN) model

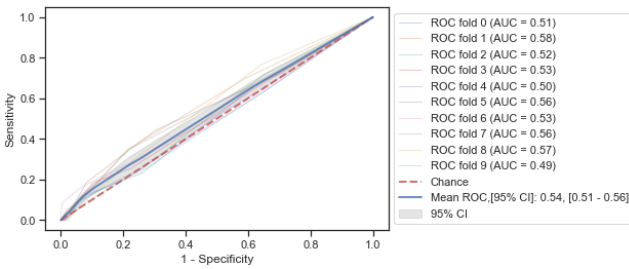

ROC, Received operating characteristic curve

**Figure S2.** Calibration plot of the imbalanced learning classifiers.

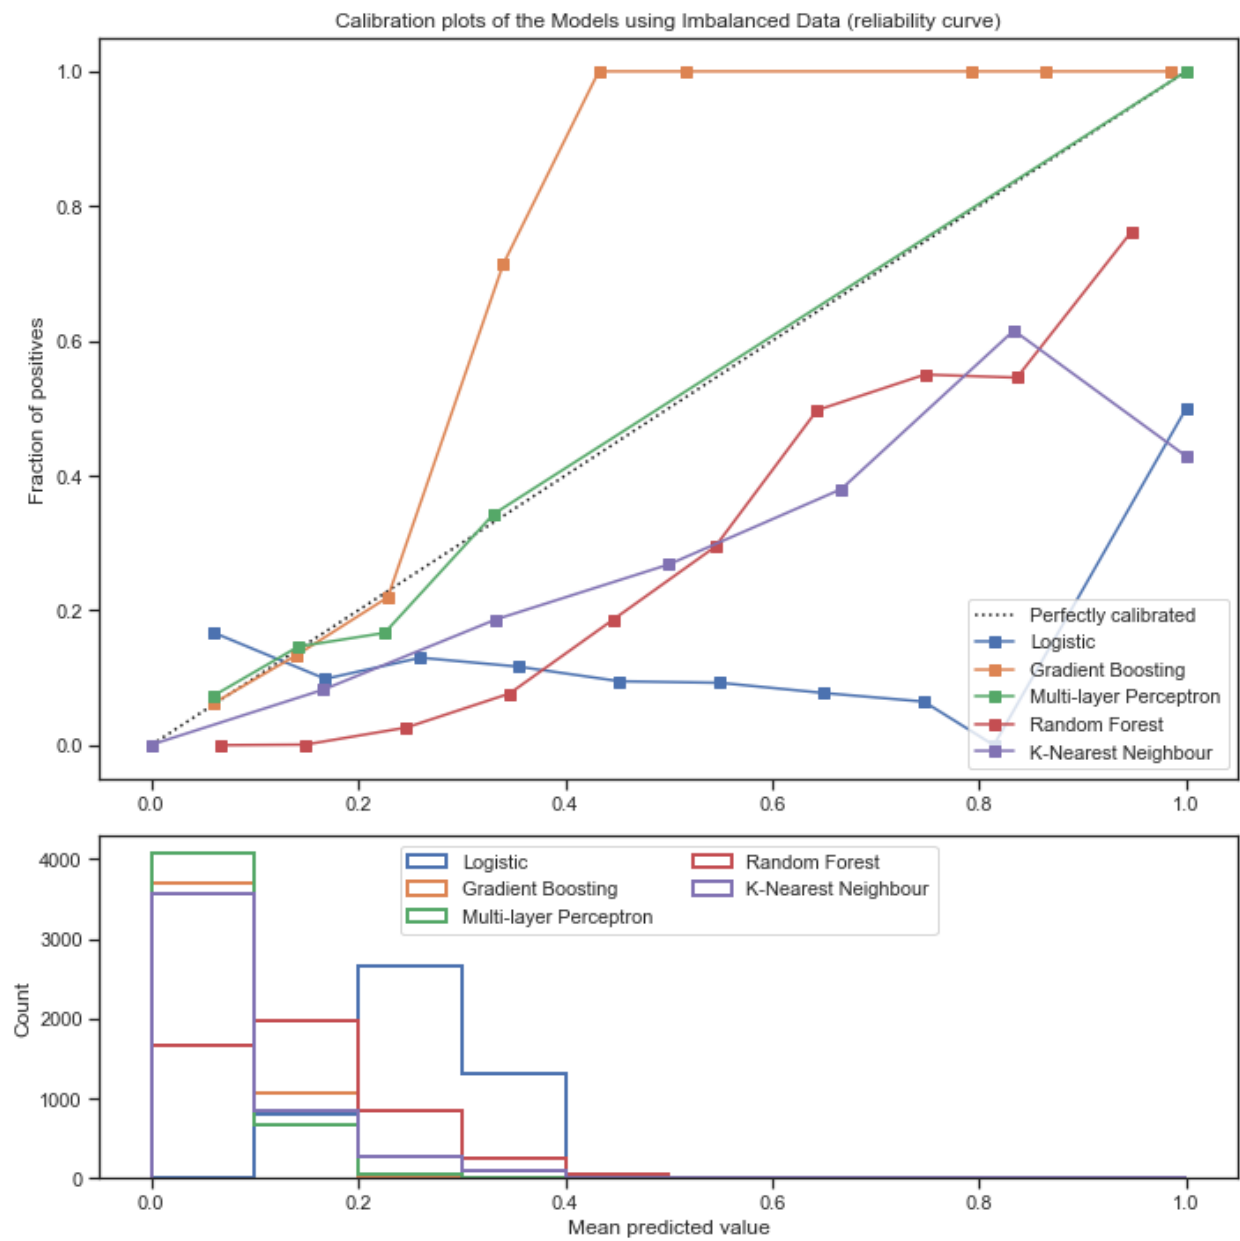

Supplement: s1 [file s1]
